# Supplementary material
Source: HighWire-hosted journal article supplement (https://erj.ersjournals.com/content/55/4/2000229)
Supplement: inline-supplementary-material-1 [file inline-supplementary-material-1.pdf]

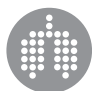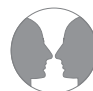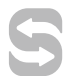

SHAREABLE PDF

# Chronic thromboembolic disease following pulmonary embolism: more work ahead

Stavros V. Konstantinides <sup>1,2</sup>

**Affiliations:** <sup>1</sup>Center for Thrombosis and Hemostasis, University Medical Center of the Johannes Gutenberg University, Mainz, Germany. <sup>2</sup>Dept of Cardiology, Democritus University of Thrace, Alexandroupolis, Greece.

**Correspondence:** Stavros V. Konstantinides, Centre for Thrombosis and Haemostasis, University Medical Centre Mainz, Langenbeckstrasse 1, Bldg. 403, 55131 Mainz, Germany. E-mail: stavros.konstantinides@unimedizin-mainz.de

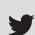

@ERSpublications

**From acute to chronic pulmonary embolism** <http://bit.ly/3893ubd>

**Cite this article as:** Konstantinides SV. Chronic thromboembolic disease following pulmonary embolism: more work ahead. *Eur Respir J* 2020; 55: 2000229 [<https://doi.org/10.1183/13993003.00229-2020>].

This single-page version can be shared freely online.

## *From the author:*

The comment by C. McCabe and colleagues provides thoughtful insights into the late sequelae of pulmonary embolism. The authors' views and suggestions, based on their clinical experience and expertise, may prove helpful in the ongoing process of reliably (and meaningfully) distinguishing chronic thromboembolic pulmonary hypertension (CTEPH) from chronic thromboembolic disease (CTED) without pulmonary hypertension at rest.
